# Supplementary material for: Using natural experiments to evaluate population health interventions: new Medical Research Council guidance
Source: HighWire-hosted journal article supplement (doi:10.1136/jech-2011-200375), 2012-05-10
Supplement: jech-2011-200375-s1.pdf [file jech-2011-200375-s1.pdf]

Supplemental Table 1 Examples of natural experimental studies to evaluate population health interventions

| Population                       | Intervention                                        | Comparator                                                                              | Outcome                                                                               | Analysis method                                                   | Results                                                                                                                                                   | Reference                                         |
|----------------------------------|-----------------------------------------------------|-----------------------------------------------------------------------------------------|---------------------------------------------------------------------------------------|-------------------------------------------------------------------|-----------------------------------------------------------------------------------------------------------------------------------------------------------|---------------------------------------------------|
| Sri Lanka - whole population     | Legal restriction on pesticide imports              | Suicide rates pre-ban; method specific suicide rates; rates of non-fatal self-poisoning | Overall suicide mortality and mortality from suicide by self-poisoning with pesticide | Graphical analysis of trends                                      | Import bans reduced method-specific and overall suicide mortality                                                                                         | Gunnell et al 2007[16]                            |
| UK - 12-17 year olds             | Restriction on prescribing SSRIs to people aged <18 | Suicidal behaviour pre-restriction                                                      | Hospitalisations for self-harm; suicide mortality                                     | Joinpoint regression                                              | Restriction on prescribing of SSRIs was not associated with changes in suicidal behaviour                                                                 | Wheeler et al 2008[18]                            |
| Finland - men and women aged >15 | Reduction in alcohol taxes                          | Alcohol related mortality before the tax change                                         | Alcohol-related mortality                                                             | Poisson regression to obtain relative rates; time-series analysis | Alcohol-related mortality increased, especially among the unemployed                                                                                      | Herttua et al 2008,[40]<br>Herttua et al 2011[41] |
| Hong Kong - whole population     | Legislation to restrict sulphur content of fuel     | Mortality pre-restriction, overall and by district                                      | All-cause and cause specific mortality                                                | Poisson regression of change in seasonally adjusted death rates   | Cardiovascular, respiratory and overall mortality fell post-restriction; decline greater in districts with larger falls in SO <sub>2</sub> concentrations | Hedley et al 2002[26]                             |
| Dublin – whole population        | Ban on coal sales                                   | Mortality pre-ban, and in the rest of Ireland                                           | Non-trauma, respiratory and cardiovascular mortality                                  | Interrupted time-series                                           | Non-trauma, respiratory and cardiovascular death rates fell post-ban                                                                                      | Clancy et al 2002[25]                             |

| Population                                  | Intervention                                                                         | Comparator                                                                  | Outcome                                                 | Analysis method                                                                                                                                         | Results                                                                                                                                                                                                                                                                                  | Reference                  |
|---------------------------------------------|--------------------------------------------------------------------------------------|-----------------------------------------------------------------------------|---------------------------------------------------------|---------------------------------------------------------------------------------------------------------------------------------------------------------|------------------------------------------------------------------------------------------------------------------------------------------------------------------------------------------------------------------------------------------------------------------------------------------|----------------------------|
| Scotland – patients admitted to 9 hospitals | Legislative ban on smoking in public places                                          | Hospitalisations pre-ban and in England                                     | Hospitalisations for acute coronary syndrome            | Comparison of numbers of admissions pre and post ban                                                                                                    | Admissions for acute coronary syndrome fell among both smokers and non-smokers post-ban                                                                                                                                                                                                  | Pell et al 2008[23]        |
| England – patients aged >17                 | Legislative ban on smoking in public places                                          | Hospitalisations pre-ban                                                    | Emergency admissions for myocardial infarction          | Interrupted time-series                                                                                                                                 | Small but significant fall in emergency admissions in the first year post-ban                                                                                                                                                                                                            | Sims et al 2010[24]        |
| India – pregnant women                      | Cash incentives to use a health facility to give birth                               | Districts with low rates of take up; births to women not receiving payments | Use of health facilities; infant and maternal mortality | Matched and unmatched comparisons of recipient and non-recipient births; difference-in-differences analysis of district level usage and mortality rates | Higher rates of take-up of the incentives were associated with higher proportions of births within health care facilities; use of health care facilities to give birth was associated with fewer perinatal and neonatal deaths. There was a non-significant reduction in maternal deaths | Lim et al 2010[30]         |
| England – general practitioners             | Abolition of GP fundholding                                                          | Non-fundholding practices; pre-abolition admission rates                    | Referral for elective and emergency admissions          | Difference-in-difference analysis of referrals from fundholders and non-fundholders                                                                     | Fundholders had lower rates of elective referral while fundholding was in operation and their rates of referral increased more than those of non-fundholders following abolition. There was no difference in emergency admissions pre or post abolition.                                 | Dusheiko et al 2003[31]    |
| USA – low income families with children     | Headstart - help with parenting, nutrition, health and social services and schooling | US counties with poverty levels above the cutoff used to allocate help      | Mortality from causes of death amenable to Headstart    | Regression discontinuity design, comparing regressions of                                                                                               | For Headstart-related causes, there was a discontinuity in mortality rates at the cutoff, but no difference in deaths from other causes or among children too old to                                                                                                                     | Ludwig and Miller 2007[28] |

|                                                                      |                                                                          |                                  |                                   |                                                                                     |                                                                                                                                                                                                                                                              |                       |
|----------------------------------------------------------------------|--------------------------------------------------------------------------|----------------------------------|-----------------------------------|-------------------------------------------------------------------------------------|--------------------------------------------------------------------------------------------------------------------------------------------------------------------------------------------------------------------------------------------------------------|-----------------------|
| aged 3-5                                                             |                                                                          | with accessing Headstart funding | services                          | mortality on poverty for counties above and below the cutoff                        | qualify for Headstart services                                                                                                                                                                                                                               |                       |
| USA – patients admitted to hospital with acute myocardial infarction | Invasive cardiac treatment (catherisation followed by revascularisation) | Non-invasive cardiac treatment   | Long term (i.e. 7-year) mortality | Instrumental variable analysis using regional catherisation rates as the instrument | Cardiac catherisation was associated with lower mortality; instrumental variable analyses produced smaller estimates of effect than analyses (multivariate risk adjustment, propensity score-based methods) that only adjust for observed prognostic factors | Stukel et al 2007[39] |
